# Supplementary material for: Broad-Spectrum Antiviral Activity of the Amphibian Antimicrobial Peptide Temporin L and Its Analogs
Source: MDPI journal article supplement (doi:10.3390/ijms23042060), 2022-02-13
Supplement: s1 [file s1]

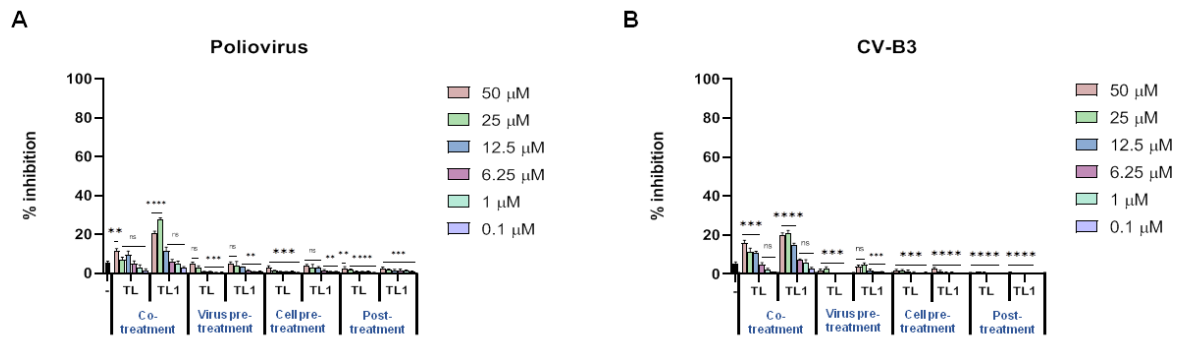

**Figure S1.** Antiviral activity of TL and TL1 against non enveloped RNA virus. Peptides were added in four different “time-of-addition” experiments and their antiviral potential has been analysed against (A) poliovirus and (B) CV-B3. \*\*\*\*  $p < 0.0001$ ; \*\*\*  $p < 0.001$ ; \*\*  $p < 0.01$ ; ns: non-significant.

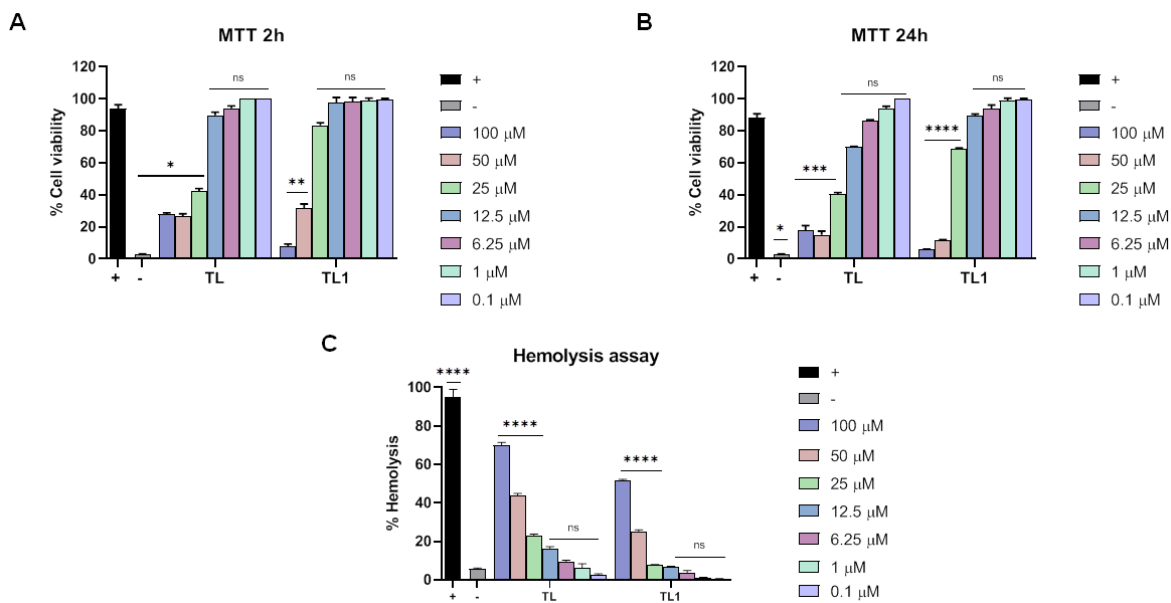

**Figure S2.** Peptide toxicity analysis on Vero cells. TL and TL1 toxicity was evaluated by MTT assay after (A) 2 hours and (B) 24 hours peptide treatment and (C) hemolysis assay. \*\*\*\*  $p < 0.0001$ ; \*\*\*  $p < 0.001$ ; \*\*  $p < 0.01$ , \*  $p < 0.05$ ; ns: non-significant.

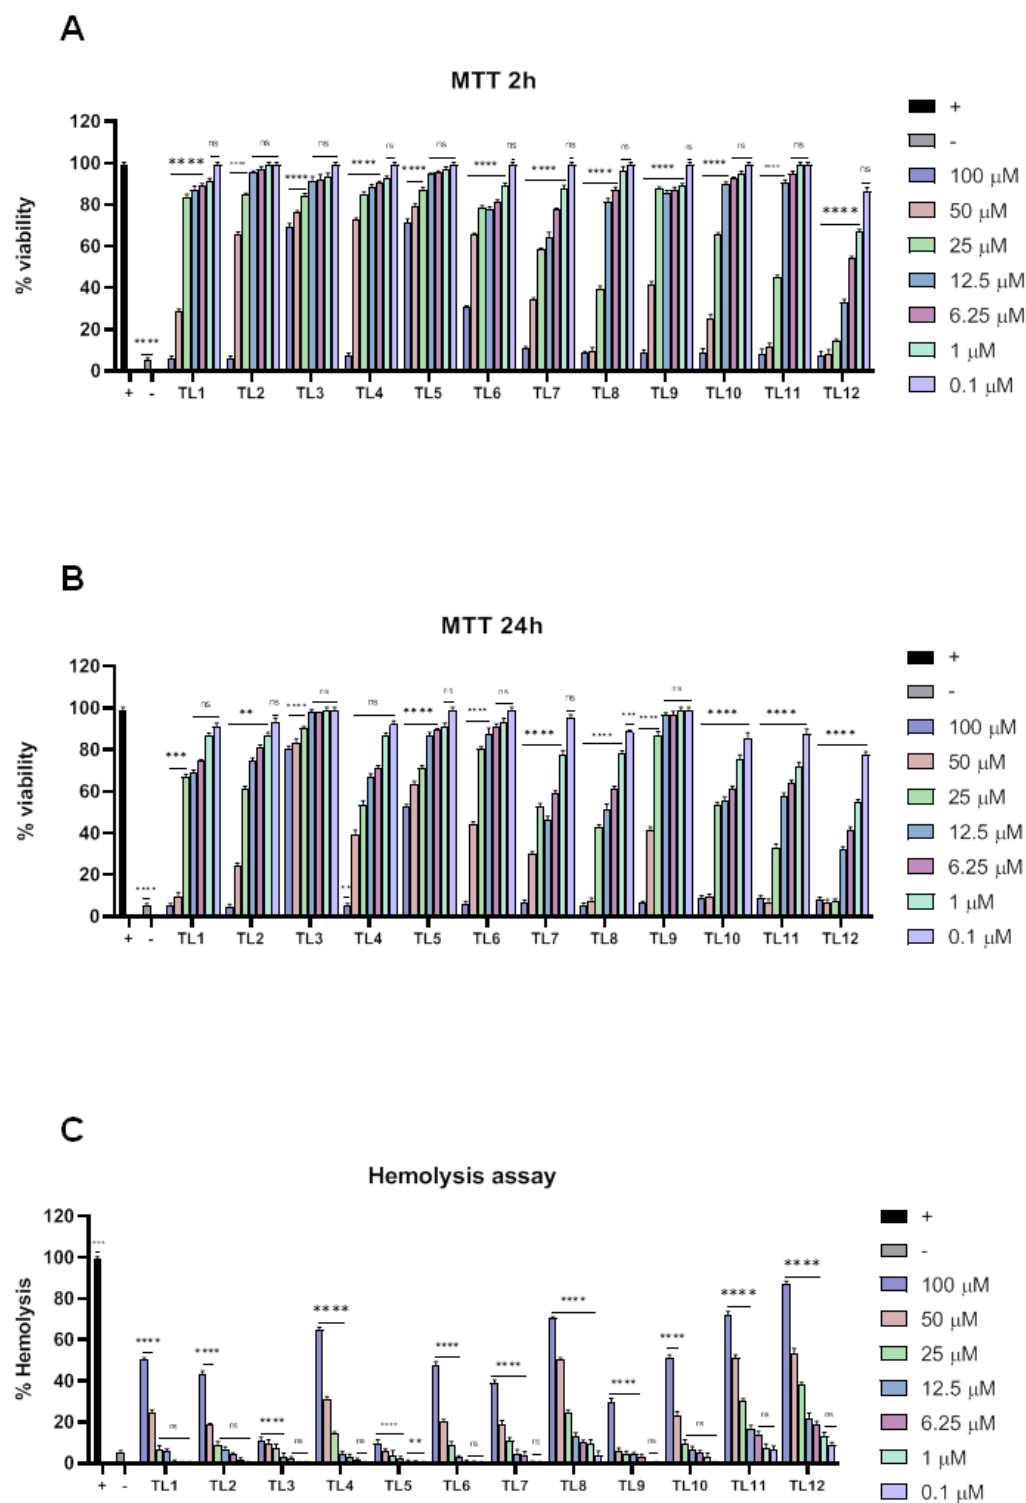

**Figure S3.** TL1 analogues toxicity analysis on Vero cells. Peptides toxicity was evaluated by MTT assay after (A) 2 hours and (B) 24 hours peptide treatment and (C) hemolysis assay. \*\*\*\*  $p < 0.0001$ ; \*\*\*  $p < 0.001$ ; \*\*  $p < 0.01$ ; ns: non-significant.

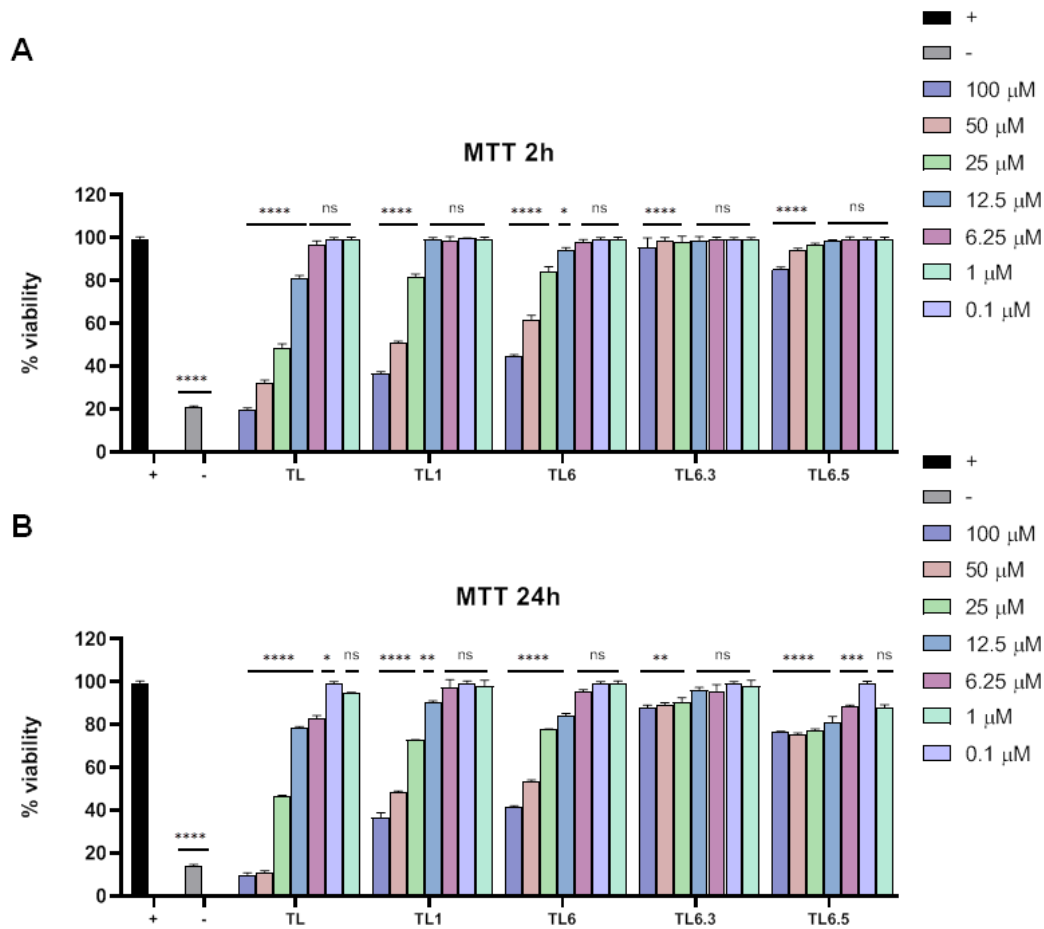

**Figure S4.** TL, TL1, TL6, TL6.3 and TL6.5 toxicity analysis on PBMCs. Peptides toxicity was evaluated by MTT assay after (A) 2 hours and (B) 24 hours peptide treatment. \*\*\*\*  $p < 0.0001$ ; \*\*\*  $p < 0.001$ ; \*\*  $p < 0.01$ , \*  $p < 0.1$ ; ns: non-significant.

**Table S1.** CC<sub>50</sub>, IC<sub>90</sub>, IC<sub>50</sub> and TI calculated for HSV-2 and HPIV-3. Concentrations are expressed in  $\mu$ M.

|      | CC <sub>50</sub> | IC <sub>90</sub> |        | IC <sub>50</sub> |        | TI    |        |
|------|------------------|------------------|--------|------------------|--------|-------|--------|
|      |                  | HSV-2            | HPIV-3 | HSV-2            | HPIV-3 | HSV-2 | HPIV-3 |
| TL1  | 42.18            | 16.71            | >50.00 | 8.86             | >50.00 | 4.76  | -      |
| TL2  | 56.52            | 19.20            | >50.00 | 9.83             | >50.00 | 5.75  | -      |
| TL3  | >100.00          | >50.00           | >50.00 | >50.00           | >50.00 | -     | -      |
| TL4  | 60.90            | 19.02            | >50.00 | 9.61             | >50.00 | 6.34  | -      |
| TL5  | >100.00          | >50.00           | >50.00 | >50.00           | >50.00 | -     | -      |
| TL6  | 64.52            | 6.28             | >50.00 | 0.92             | 32.35  | 70.13 | 1.99   |
| TL7  | 32.16            | 11.92            | >50.00 | 3.13             | >50.00 | 10.27 | -      |
| TL8  | 22.32            | 7.99             | >50.00 | 1.00             | 40.69  | 22.32 | 0.55   |
| TL9  | 45.92            | 12.50            | >50.00 | 2.80             | 40.64  | 16.40 | 1.13   |
| TL10 | 35.47            | 12.50            | >50.00 | 0.77             | >50.00 | 46.06 | -      |
| TL11 | 24.12            | 9.76             | >50.00 | 0.58             | 41.18  | 41.59 | 0.59   |
| TL12 | 8.28             | 11.68            | >50.00 | 0.54             | 33.83  | 15.33 | 0.24   |

**Table S2.** CC<sub>50</sub>, IC<sub>90</sub>, IC<sub>50</sub> and TI calculated for HCoV-229E and HCoV-OC43. Concentrations are expressed in  $\mu$ M.

|             | CC <sub>50</sub> | IC <sub>90</sub> |           | IC <sub>50</sub> |           | TI        |           |
|-------------|------------------|------------------|-----------|------------------|-----------|-----------|-----------|
|             |                  | HCoV-229E        | HCoV-OC43 | HCoV-229E        | HCoV-OC43 | HCoV-229E | HCoV-OC43 |
| <b>TL1</b>  | 42.18            | 30.07            | 14.98     | 7.66             | 7.33      | 5.51      | 5.75      |
| <b>TL2</b>  | 56.52            | 50.00            | 24.13     | 10.56            | 11.31     | 5.35      | 5.00      |
| <b>TL3</b>  | >100.00          | >50.00           | >50.00    | >50.00           | >50.00    | -         | -         |
| <b>TL4</b>  | 60.90            | >50.00           | 27.65     | 11.74            | 11.33     | 5.19      | 5.38      |
| <b>TL5</b>  | >100.00          | >50.00           | >50.00    | >50.00           | >50.00    | -         | -         |
| <b>TL6</b>  | 64.52            | 13.06            | 10.04     | 2.08             | 0.97      | 31.02     | 66.52     |
| <b>TL7</b>  | 32.16            | >50.00           | 24.74     | 6.21             | 8.55      | 5.18      | 3.76      |
| <b>TL8</b>  | 22.32            | 50.00            | 16.30     | 4.39             | 2.90      | 5.08      | 7.70      |
| <b>TL9</b>  | 45.92            | 50.00            | 29.17     | 5.39             | 8.29      | 8.52      | 5.54      |
| <b>TL10</b> | 35.47            | 50.00            | 24.17     | 0.91             | 0.96      | 38.98     | 36.95     |
| <b>TL11</b> | 24.12            | 50.00            | 17.41     | 0.92             | 5.10      | 26.22     | 4.73      |
| <b>TL12</b> | 8.28             | 20.90            | 13.18     | 0.74             | 0.62      | 11.19     | 13.35     |
